# Supplementary material
Source: Springer Nature journal article supplement (https://www.springermedizin.de/resource/supplementary/13049_2008_22_MOESM2_ESM.pdf/9665770)

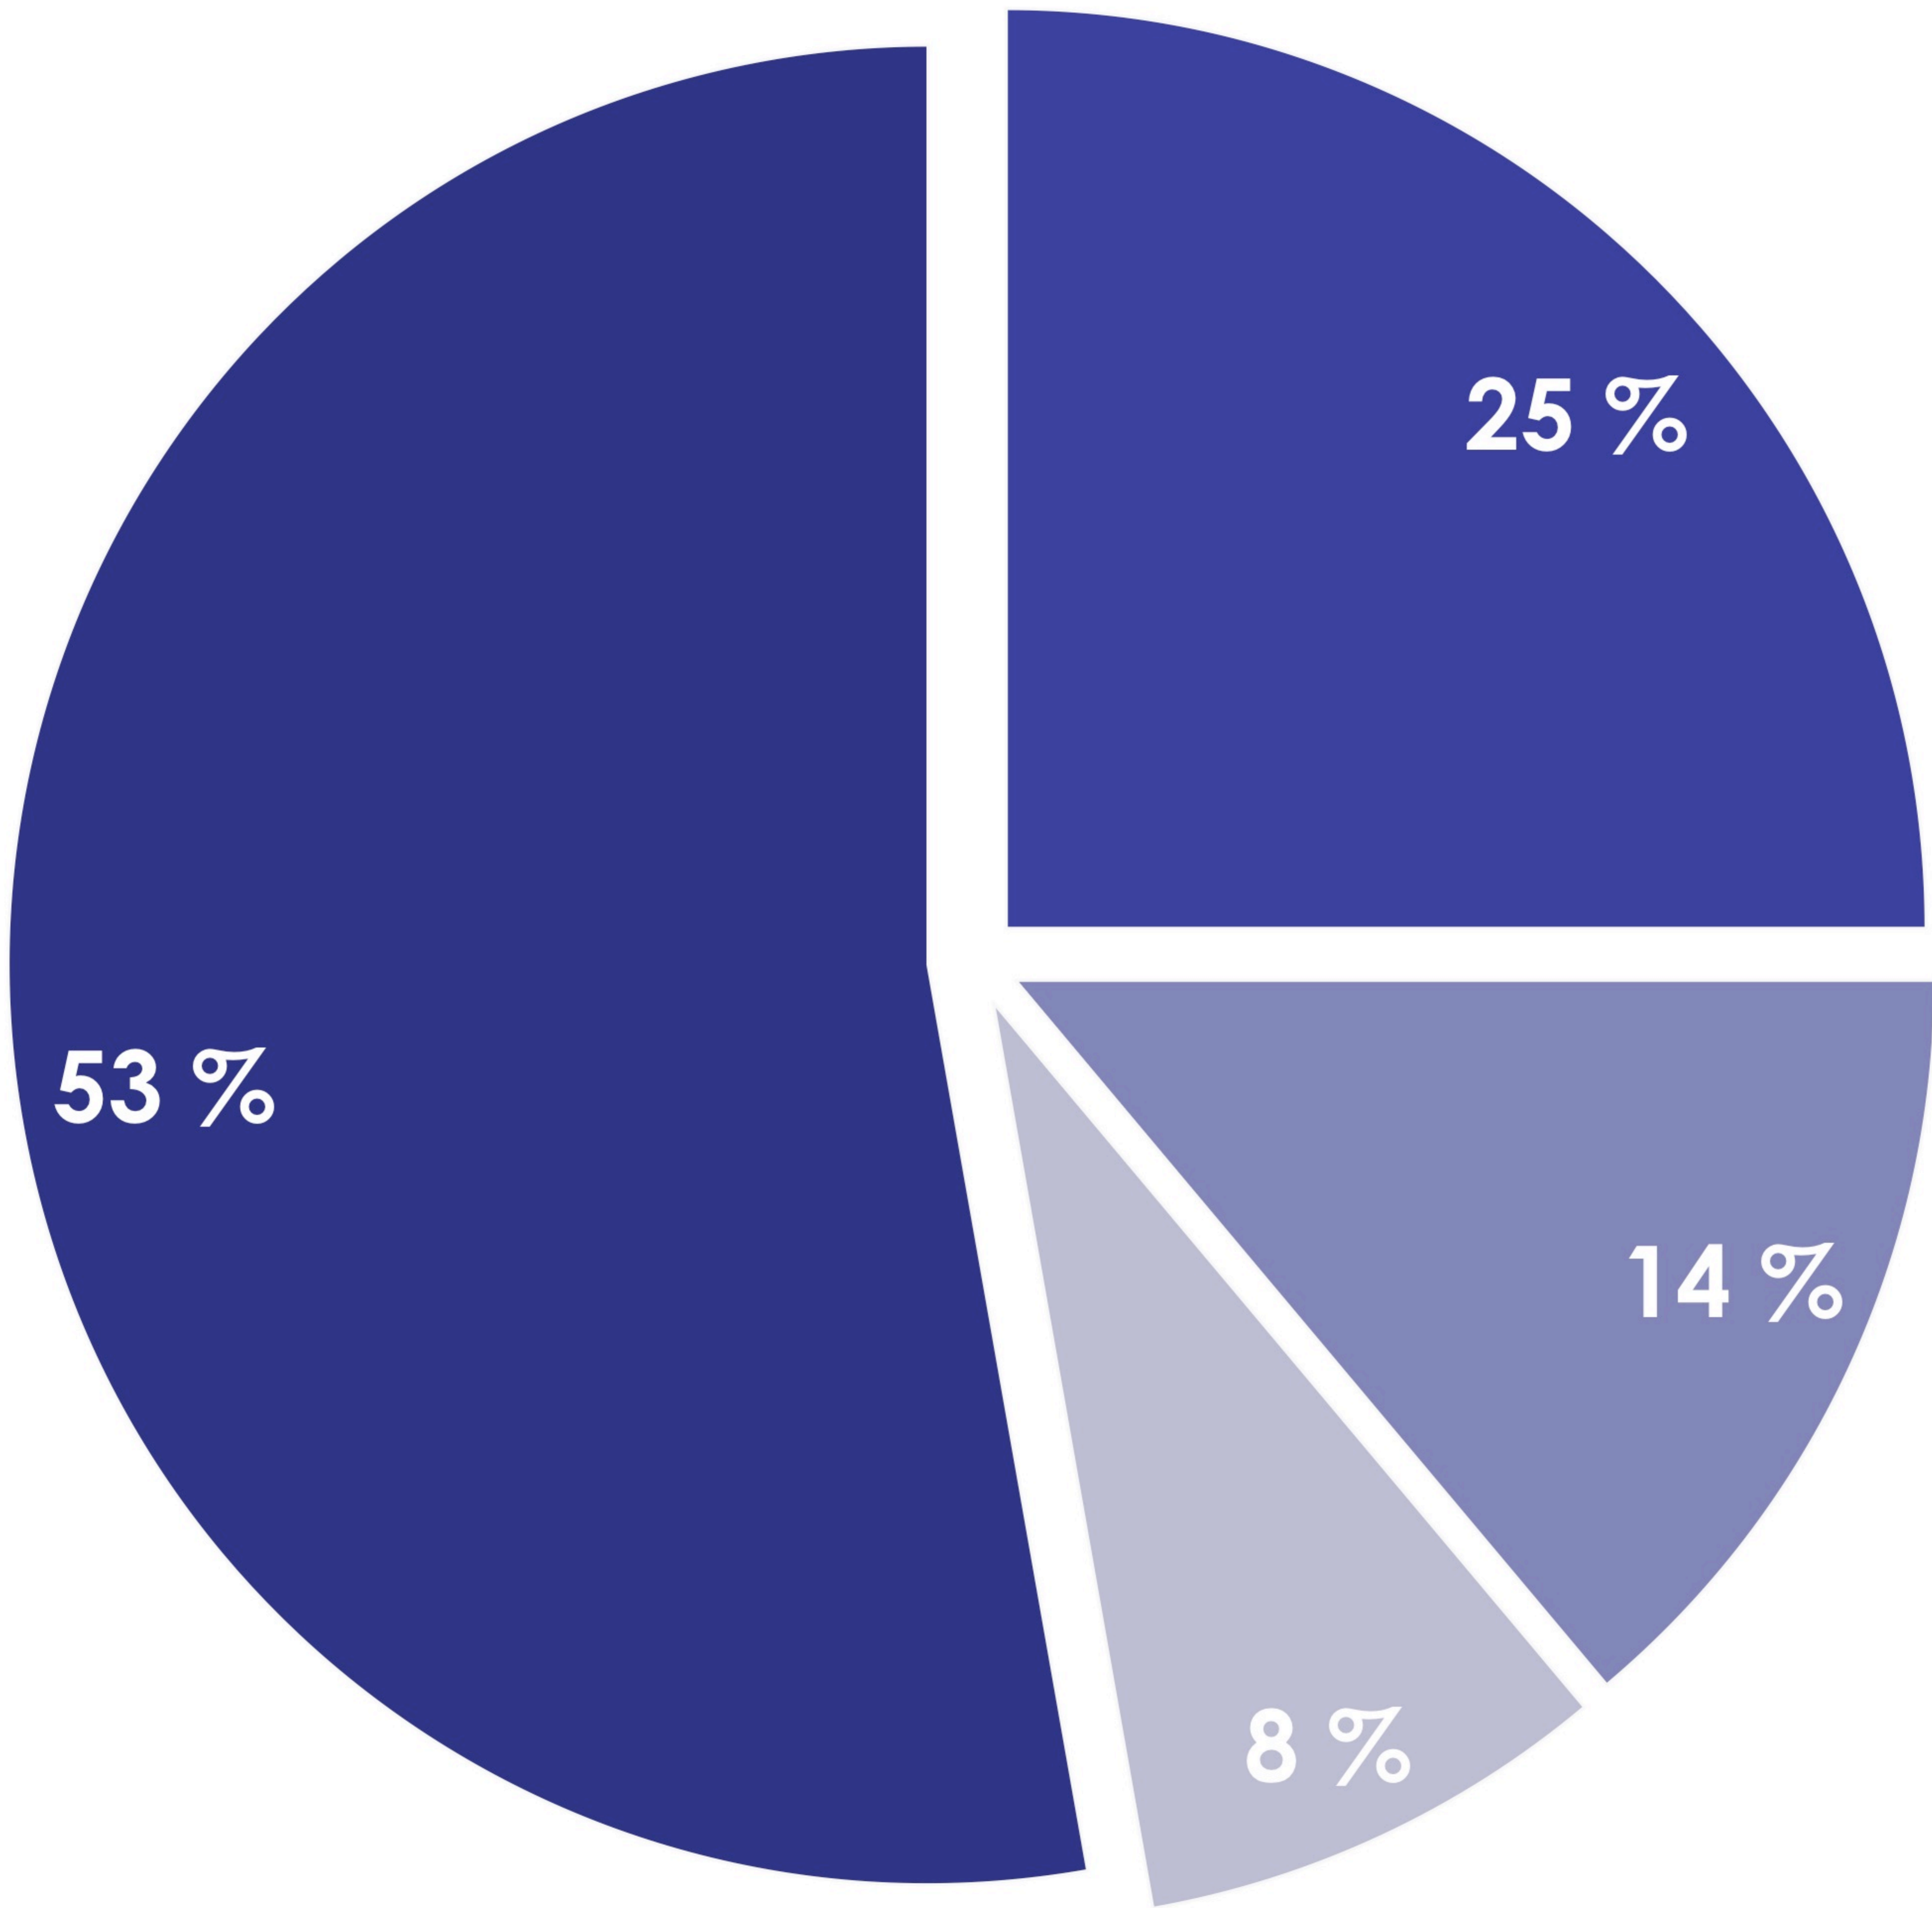

- spring
- summer
- fall
- winter

Supplement: MOESM2 [file 9665770]
